# Supplementary material for: Ethanol Coupling Reactions over MgO–Al2O3 Mixed Oxide-Based Catalysts for Producing Biofuel Additives
Source: MDPI journal article supplement (doi:10.3390/molecules28093788), 2023-04-28
Supplement: s1 [file s1]

# Supplementary Materials

## Ethanol Coupling Reactions over MgO–Al<sub>2</sub>O<sub>3</sub> Mixed Oxide-Based Catalysts for Producing Biofuel Additives

Anna Vikár <sup>1</sup>, Ferenc Lónyi <sup>1,\*</sup>, Amosi Makoye <sup>1,2</sup>, Tibor Nagy <sup>1</sup>, Gyula Novodárszki <sup>1</sup>, Róbert Barthos <sup>1</sup>, Blanka Szabó <sup>1</sup>, József Valyon <sup>1</sup>, Magdolna R. Mihályi <sup>1</sup>, Dhanapati Deka <sup>3</sup> and Hanna E. Solt <sup>1</sup>

1 Institute of Materials and Environmental Chemistry, Research Centre for Natural Sciences, Magyar Tudósok Körútja 2, 1117 Budapest, Hungary.

2 Hevesy György Doctoral School of Chemistry, ELTE Eötvös Loránd University, Pázmány Péter s. 1/A, 1117 Budapest, Hungary.

3 Biomass Conversion Laboratory, Department of Energy, Tezpur University, Tezpur 784028, India.

\* Correspondence: [lonyi.ferenc@ttk.hu](mailto:lonyi.ferenc@ttk.hu)

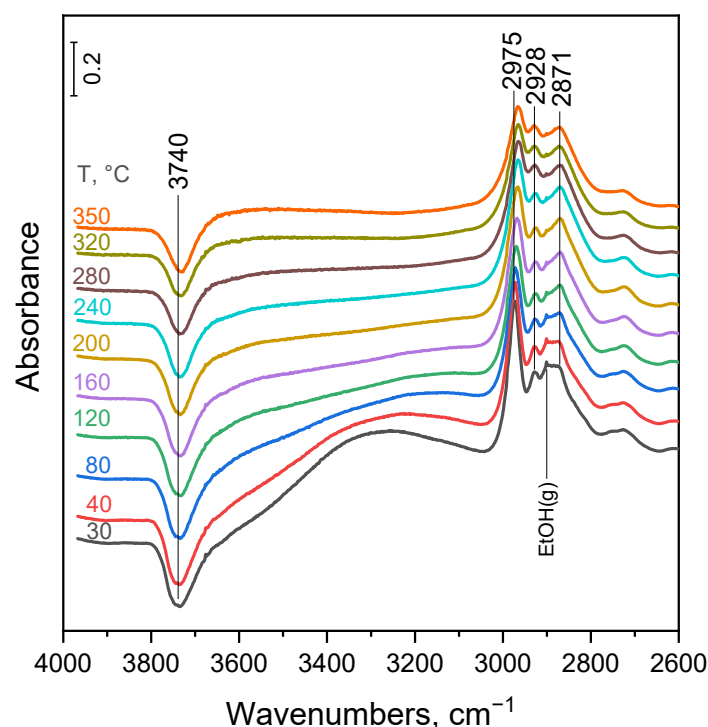

**Figure S1.** DRIFT spectra of the species obtained from adsorption and reaction of ethanol in He on MgO–Al<sub>2</sub>O<sub>3</sub>(550) catalyst in the frequency range of O–H and C–H stretching vibrations. The catalyst was contacted with a continuous flow of EtOH/He atmospheric gas mixture, while the temperature was continuously raised at a rate of 2 °C/min from 30 up to 350 °C. The corresponding spectrum of the neat catalyst was subtracted from the spectrum recorded at the indicated temperature.

The results obtained for the MgO–Al<sub>2</sub>O<sub>3</sub>(550) catalyst in contact with an EtOH/He reactant mixture are presented in Figure S1 (same as Figure 7A in the manuscript, except that the visible spectral range was extended to 4000 cm<sup>-1</sup>). Adsorption of EtOH on the activated catalyst sample resulted in the appearance of C–H stretching bands due to the formation of surface

species, which was accompanied by the development of a negative absorption band at 3740  $\text{cm}^{-1}$  in the range of the  $\nu_{\text{OH}}$  stretching vibrations, suggesting that surface OH-groups are involved in adsorption interaction. The adsorbed species gave main characteristic absorption bands at 2975 and 2928  $\text{cm}^{-1}$  in the frequency range of the  $\nu_{\text{CH}}$  stretching vibrations, which can be assigned to the asymmetric stretching vibration of the  $-\text{CH}_3$  ( $\nu_{\text{as}}[\text{CH}_3]$ ) and  $-\text{CH}_2-$  ( $\nu_{\text{as}}[\text{CH}_2]$ ) groups, respectively. A third band at 2871  $\text{cm}^{-1}$  can be attributed to the symmetric stretching vibration of the  $-\text{CH}_3$  groups ( $\nu_{\text{s}}[\text{CH}_3]$ ), probably overlapping with the band of symmetric  $-\text{CH}_2-$  vibration (a sharp band at 2901  $\text{cm}^{-1}$  is also discernible due to the minor contribution of gas-phase ethanol).

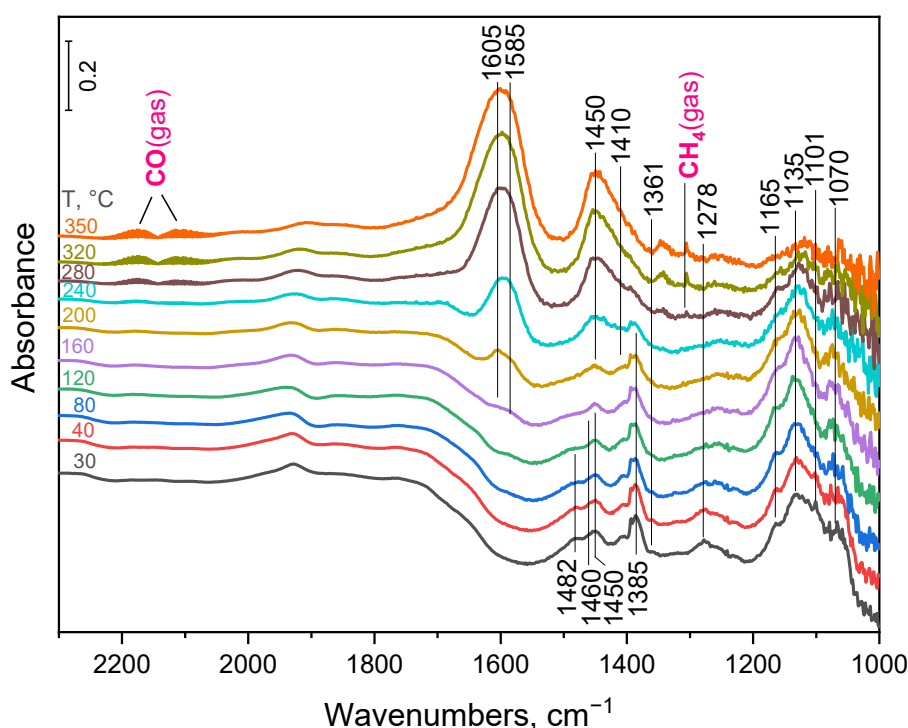

**Figure S2.** DRIFT spectra of the species obtained from adsorption and reaction of ethanol in H<sub>2</sub> on Pd/MgO–Al<sub>2</sub>O<sub>3</sub> catalyst in the frequency range of carbonyl stretching and C–H deformation vibrations. The catalyst was contacted with a continuous flow of EtOH/H<sub>2</sub> atmospheric gas mixture, while the temperature was continuously raised at a rate of 2 °C/min from 30 up to 350 °C. The corresponding spectrum of the neat catalyst was subtracted from the spectrum recorded at the indicated temperature.

The results obtained for the Pd/MgO–Al<sub>2</sub>O<sub>3</sub> catalyst in contact with an EtOH/H<sub>2</sub> reactant mixture are presented in Figure S2 (same as Figure 10B in the manuscript, except that the visible spectral range was extended to 2300  $\text{cm}^{-1}$ ). Adsorption of EtOH on the activated catalyst sample resulted in the appearance absorption bands due to C–H deformation vibrations (1500–1000  $\text{cm}^{-1}$ ) and  $\nu[\text{O-C-O}]$  stretching vibrations of carboxyl species (1700–1400  $\text{cm}^{-1}$ ) due to the formation of different surface species (for band assignments, see text in the manuscript). Results show that high reaction temperatures ( $\geq 280$  °C) accelerated the

rate of the hydrodeoxygenation (HDO) reactions, as indicated by the bands of gas-phase  $\text{CH}_4$  and  $\text{CO}$ .
